# Supplementary material for: Rapid fabrication of oxygen defective α-Fe2O3(110) for enhanced photoelectrochemical activities
Source: Royal Society of Chemistry journal article supplement (doi:10.1039/d0dt00406e), 2020-01-01
Supplement: d0dt00406e1.pdf [file d0dt00406e1.pdf]

## Electronic Supplementary Information

# Rapid Fabrication of Oxygen Defective $\alpha$ -Fe<sub>2</sub>O<sub>3</sub>(110) for Enhanced Photoelectrochemical Activities

Mohamad Firdaus Mohamad Noh<sup>a\*</sup>, Habib Ullah<sup>b,\*</sup>, Nurul Affiqah Arzaee<sup>a</sup>, Azhar Ab Halim<sup>a,c</sup>, Muhammad Amir Faizal Abdul Rahim<sup>a,c</sup>, Nurul Aida Mohamed<sup>a</sup>, Javad Safaei<sup>d</sup>, Siti Nur Farhana Mohd Nasir<sup>a</sup>, Guoxiu Wang<sup>d</sup>, Mohd Asri Mat Teridi<sup>a,\*</sup>

<sup>a</sup>Solar Energy Research Institute, Universiti Kebangsaan Malaysia, 43600 Bangi, Selangor, Malaysia.

<sup>b</sup>Renewable Energy Group, College of Engineering, Mathematics and Physical Sciences, University of Exeter, Penryn Campus, Cornwall, TR10 9FE, United Kingdom.

<sup>c</sup>School of Applied Physics, Faculty of Science and Technology, Universiti Kebangsaan Malaysia, 43600 Bangi, Selangor, Malaysia.

<sup>d</sup>Centre for Clean Energy Technology, Faculty of Science, University of Technology Sydney, Broadway, NSW, 2007 Australia.

\*Corresponding author: fir.noh@gmail.com (Mohamad Firdaus Mohamad Noh)

hu203@exeter.ac.uk (Habib Ullah)

asri@ukm.edu.my (Mohd Asri Mat Teridi)

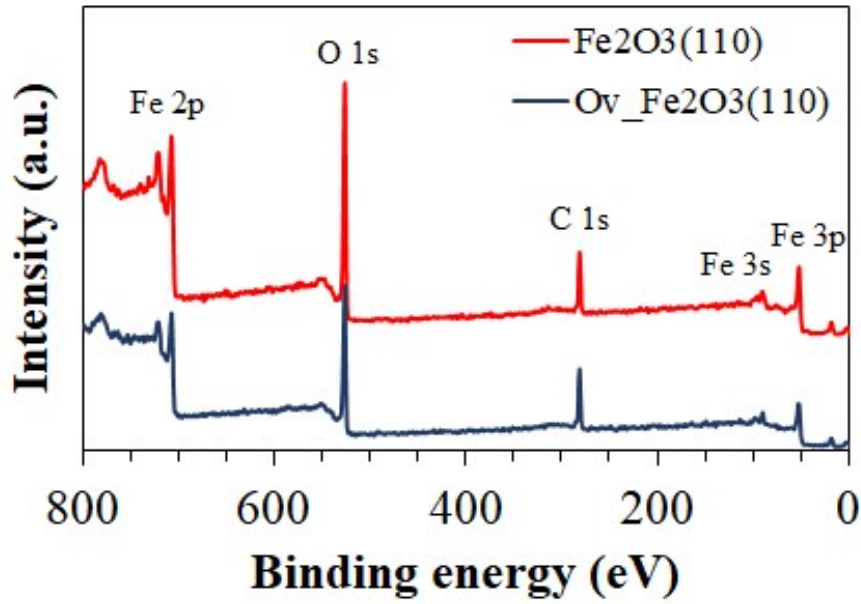

**Figure S1.** XPS survey spectra of  $\text{Fe}_2\text{O}_3(110)$  and  $\text{O}_V\text{-Fe}_2\text{O}_3(110)$ .

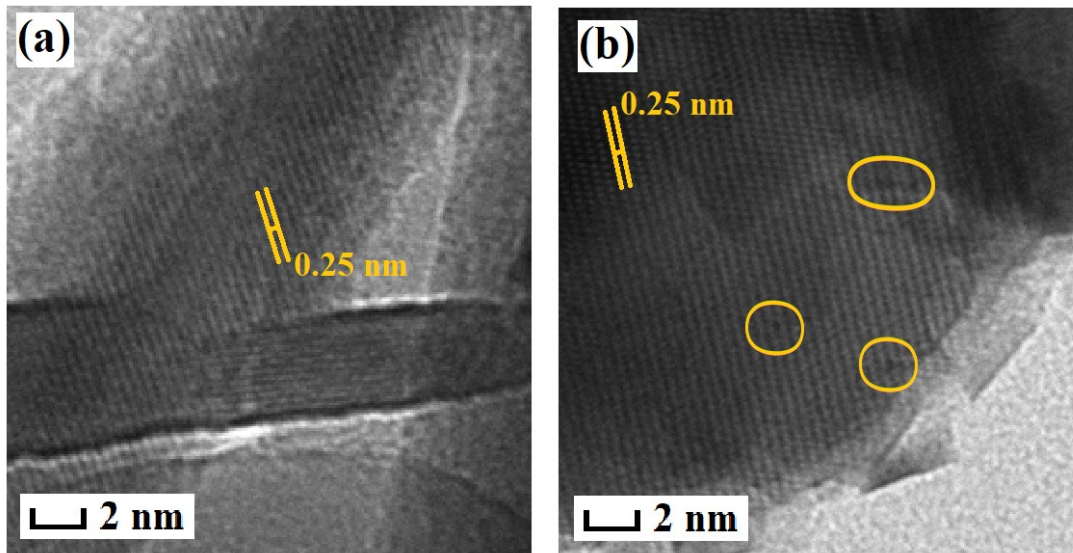

**Figure S2.** TEM images of (a)  $\text{Fe}_2\text{O}_3(110)$  and (b)  $\text{O}_V\text{-Fe}_2\text{O}_3(110)$ . The circles show the presence of oxygen vacancies in crystal lattice.

### Crystallite size calculation

The following Scherrer equation was used for the calculation of crystallite size,  $D$ :

$$D = \frac{K\lambda}{\beta \cos \theta} \quad (\text{Eq. S1})$$

where  $K$  is the shape factor with a value of 0.9,  $\lambda$  is the wavelength of X-ray,  $\beta$  is the full-width at half maximum (FWHM) of the XRD peak and  $\theta$  is the Bragg angle.

### Transient time calculation

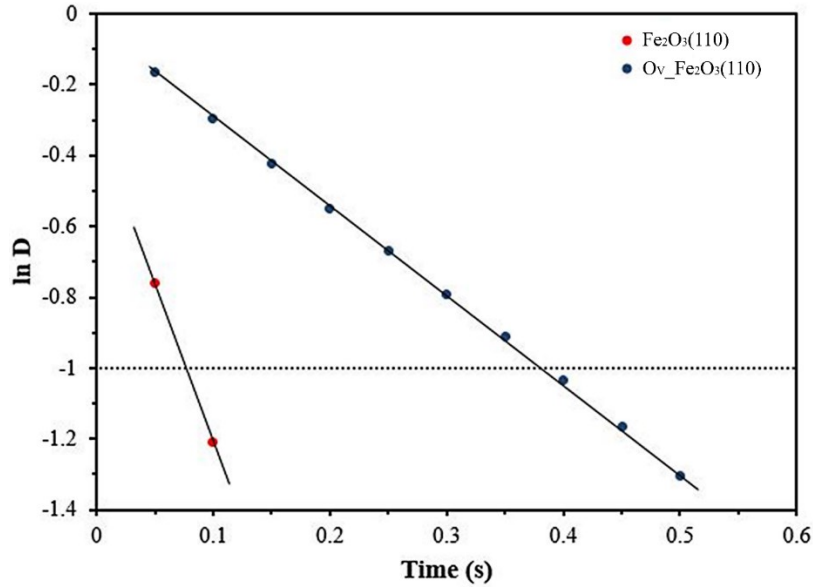

**Figure S3.** Ln D vs. time graph for the determination of transient time of Fe<sub>2</sub>O<sub>3</sub>(110) and O<sub>v</sub>-Fe<sub>2</sub>O<sub>3</sub>(110) samples.

Figure S2 was derived from Figure 5(b) using the following equations:

$$D = \frac{I_t - I_f}{I_i - I_f} \quad (\text{Eq. S2})$$

$$\tau = -t \ln D \quad (\text{Eq. S3})$$

where  $\tau$  is the transient time constant at which  $\ln D = -1$ ;  $I_t$  is the current at time  $t$ ;  $I_i$  and  $I_f$  are the initial current (i.e. maximum current right after light is on) and final current (i.e. minimum current right before light is off), respectively.

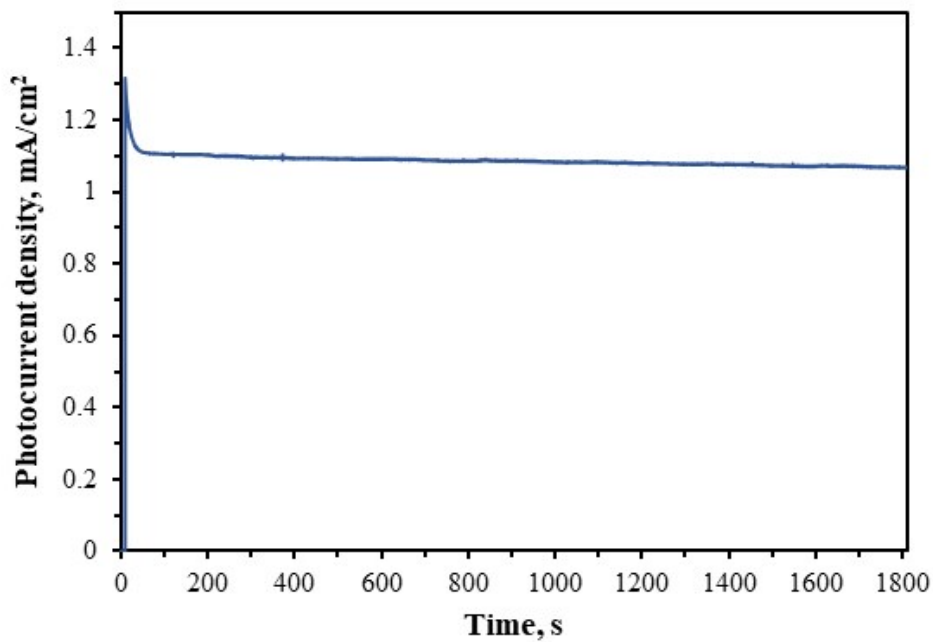

**Figure S4.** Current-time ( $I-t$ ) graph of photoelectrochemical cells for  $O_v\text{-Fe}_2\text{O}_3(110)$  photoanode measured at  $1.2\text{ V}_{\text{Ag/AgCl}}$  bias voltage under light illumination.

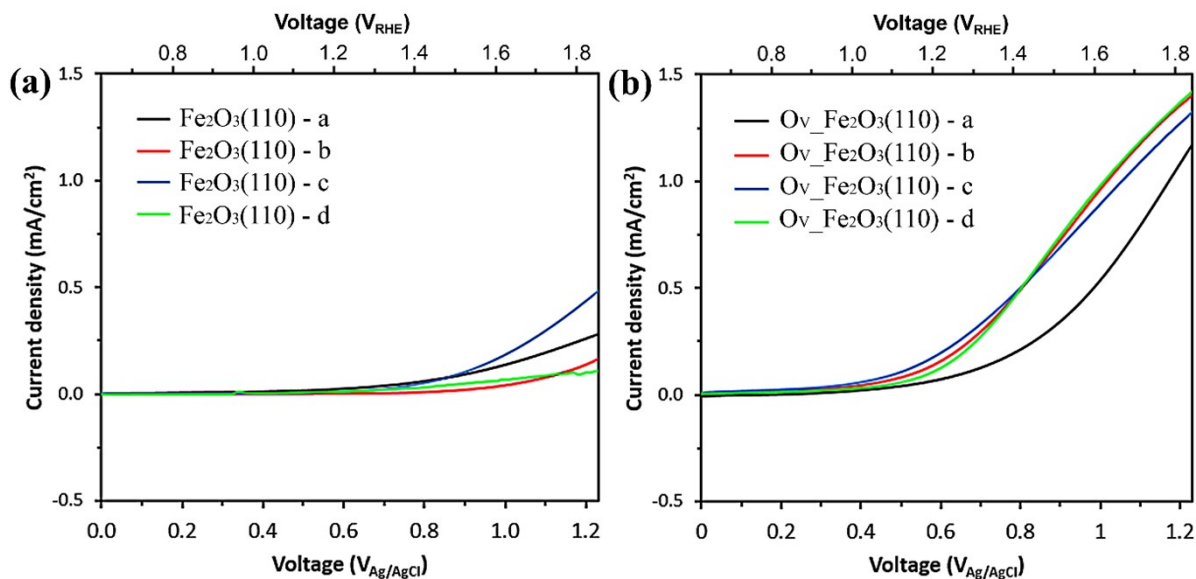

**Figure S5.** Photoelectrochemical performance of four different samples of (a)  $\text{Fe}_2\text{O}_3(110)$  and (b)  $O_v\text{-Fe}_2\text{O}_3(110)$  measured from front under light illumination.

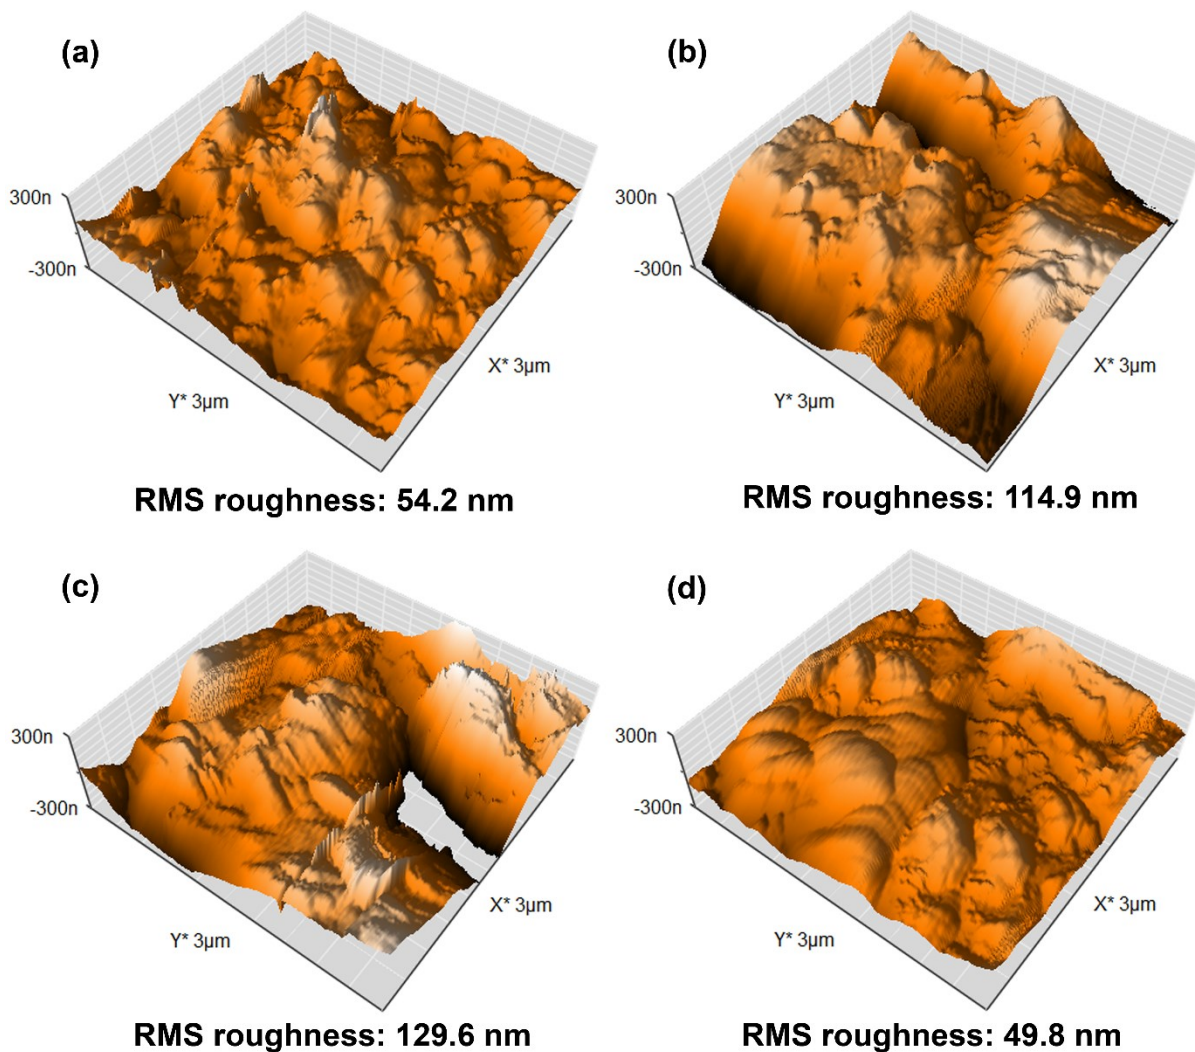

**Figure S6.** AFM images of  $\text{Fe}_2\text{O}_3(110)$  film deposited via AACVD for (a) 10 min, (b) 20 min, (c) 40 min and (d) 60 min.

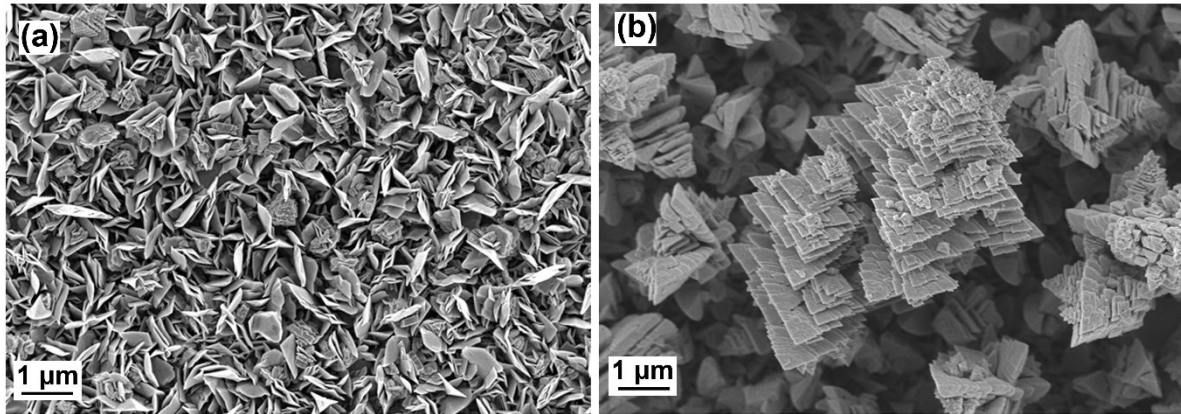

**Figure S7.** FESEM images of  $\text{Fe}_2\text{O}_3(110)$  deposited for (a) 10 min and (b) 40 min. Prolonging the deposition time converts the structure of  $\alpha\text{-Fe}_2\text{O}_3$  film from nanoflakes to nanoflowers.
